# Supplementary material
Source: MDPI journal article supplement (https://www.mdpi.com/2311-7524/8/1/54)
Supplement: s1 [file s1]

## Supplementary materials

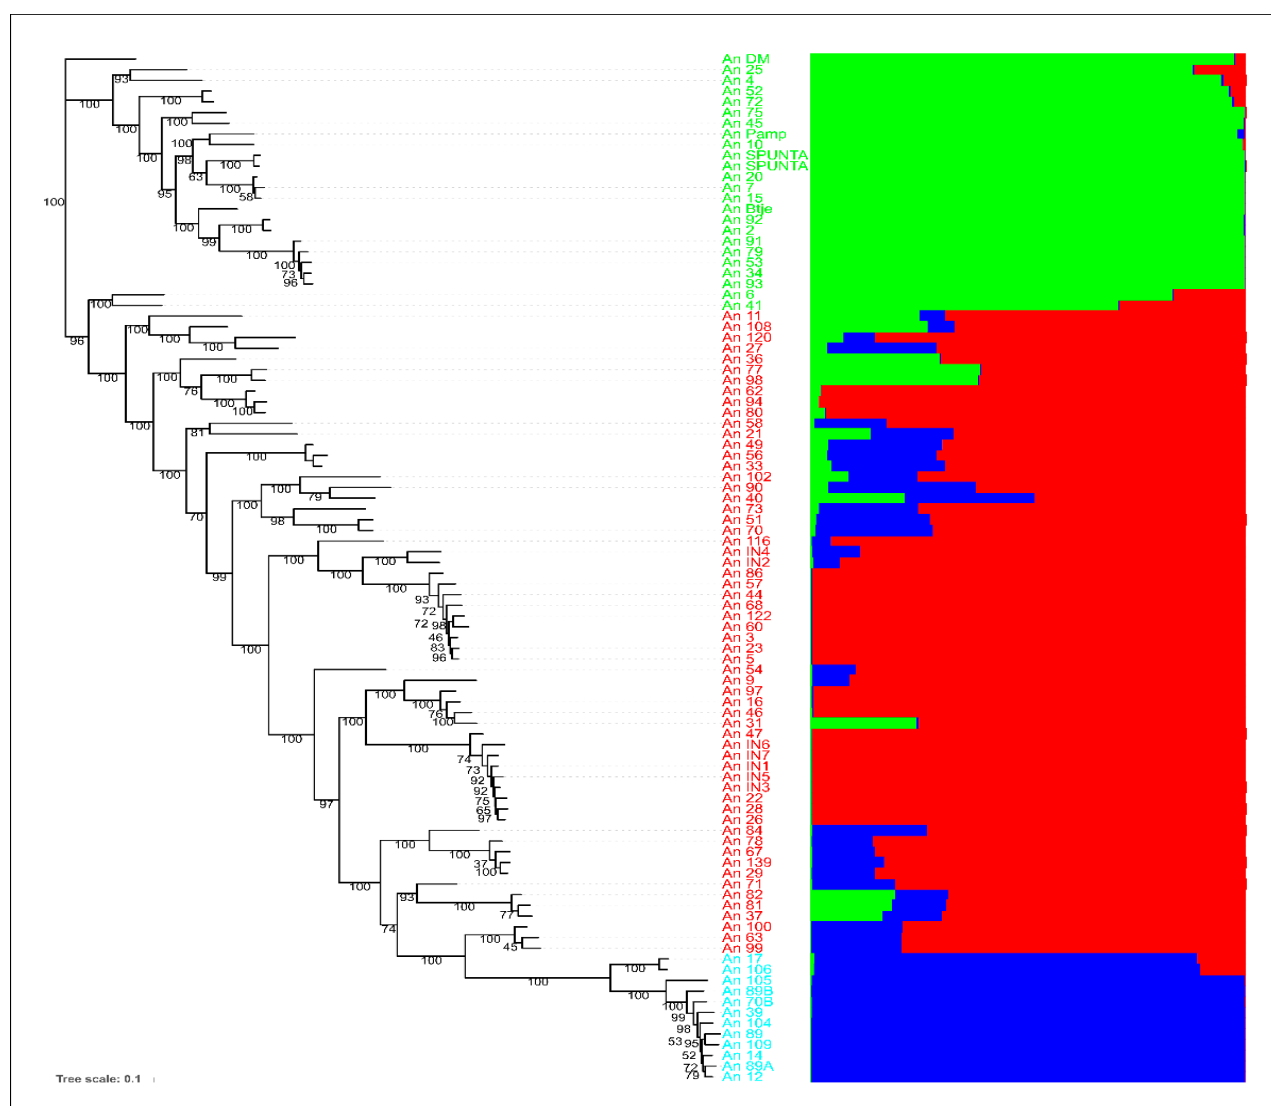

**Figure S1.** STRUCTURE plot of a subset of 96 potato accessions with memberships higher than 0.6 to any of the 3 subpopulations based on 5035 SNP markers. Each column corresponds to one accession and is partitioned into colored segments that are in proportion to the estimated membership to the 3 subpopulations. Maximum likelihood trees are shown on the left side. Accessions were color labeled according to STRUCTURE results.
